# Supplementary material
Source: PubMed Central journal article supplement (PMC3055568)

**A.**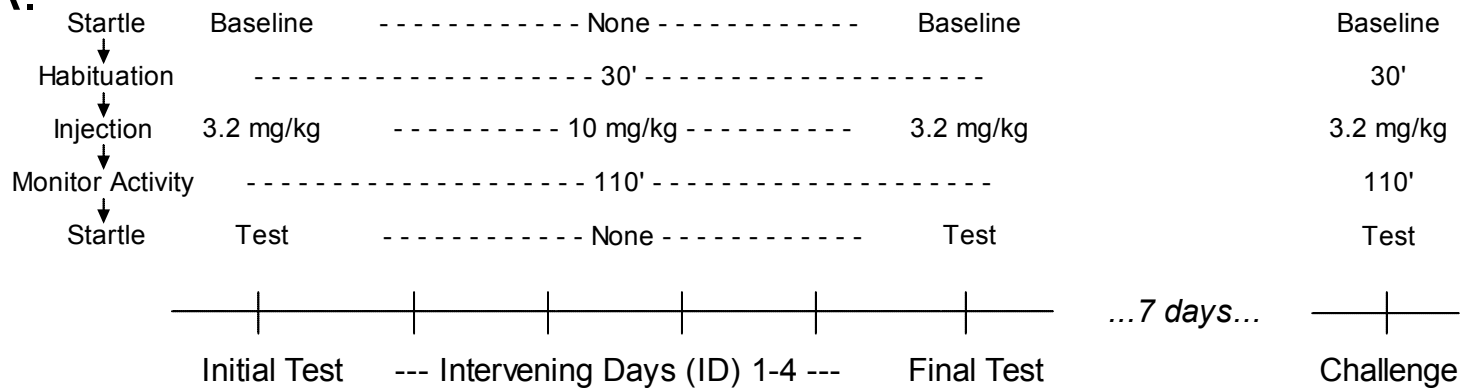**B.**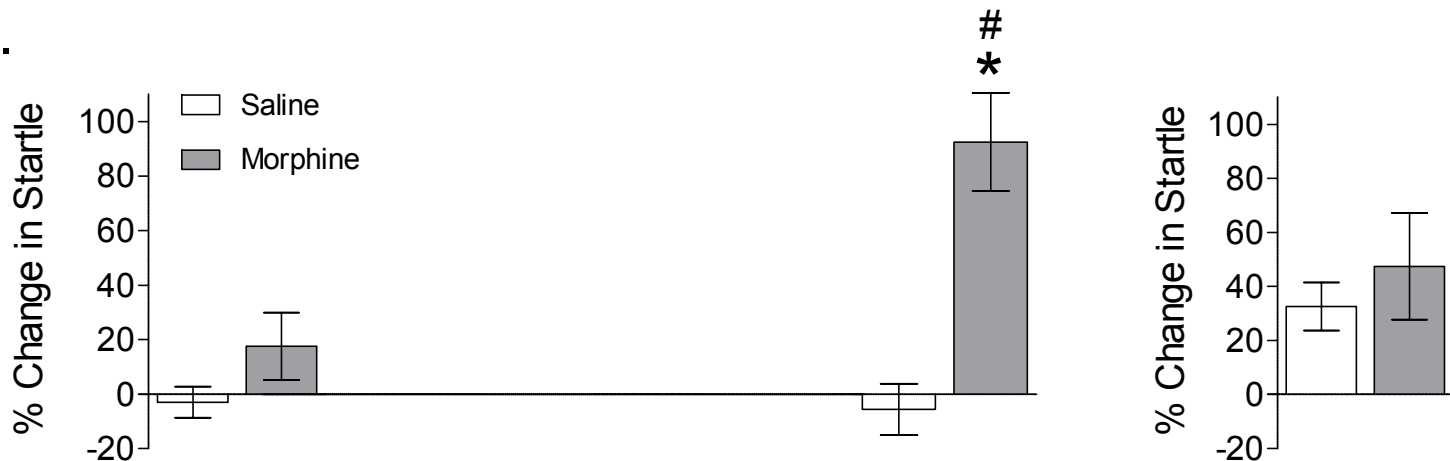

Supplement: npp2010134x1.pdf [file npp2010134x1.pdf]
